# Supplementary material for: Cardiolipin Synthesis in Brown and Beige Fat Mitochondria Is Essential for Systemic Energy Homeostasis
Source: PubMed Central journal article supplement (PMC6038052; doi:10.1016/j.cmet.2018.05.003), 2018-07-03
Supplement: mmc1.pdf [file mmc1.pdf]

## Supplemental Information

### Cardiolipin Synthesis in Brown and Beige

#### Fat Mitochondria Is Essential

#### for Systemic Energy Homeostasis

**Elahu G. Sustarsic, Tao Ma, Matthew D. Lynes, Michael Larsen, Iuliia Karavaeva, Jesper F. Havelund, Carsten H. Nielsen, Mark P. Jedrychowski, Marta Moreno-Torres, Morten Lundh, Kaja Plucinska, Naja Z. Jespersen, Trisha J. Grevengoed, Barbara Kramar, Julia Peics, Jakob B. Hansen, Farnaz Shamsi, Isabel Forss, Ditte Neess, Susanne Keipert, Jianing Wang, Katharina Stohlmann, Ivan Brandslund, Cramer Christensen, Marit E. Jørgensen, Allan Linneberg, Oluf Pedersen, Michael A. Kiebish, Klaus Qvortrup, Xianlin Han, Bente Klarlund Pedersen, Martin Jastroch, Susanne Mandrup, Andreas Kjær, Steven P. Gygi, Torben Hansen, Matthew P. Gillum, Niels Grarup, Brice Emanuelli, Søren Nielsen, Camilla Scheele, Yu-Hua Tseng, Nils J. Færgeman, and Zachary Gerhart-Hines**

**A**

## PCA of iBAT proteomics

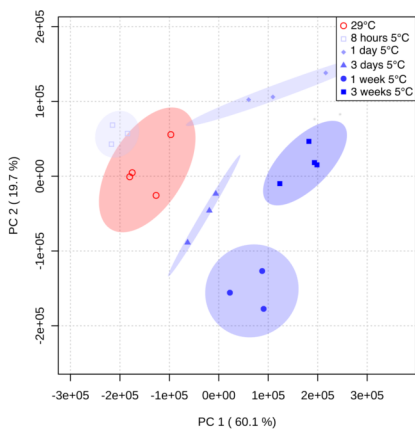**B**

## Known protein markers of iBAT thermogenesis

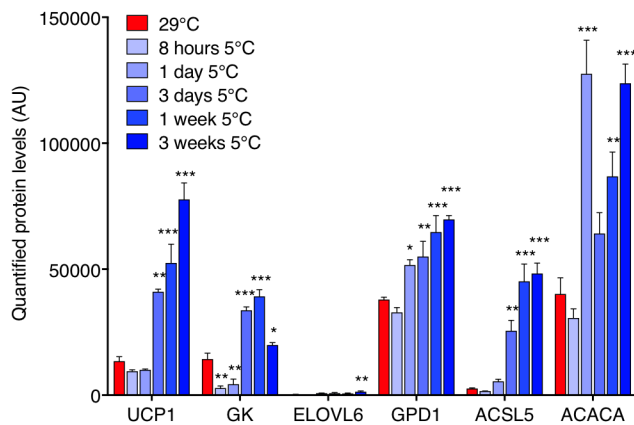

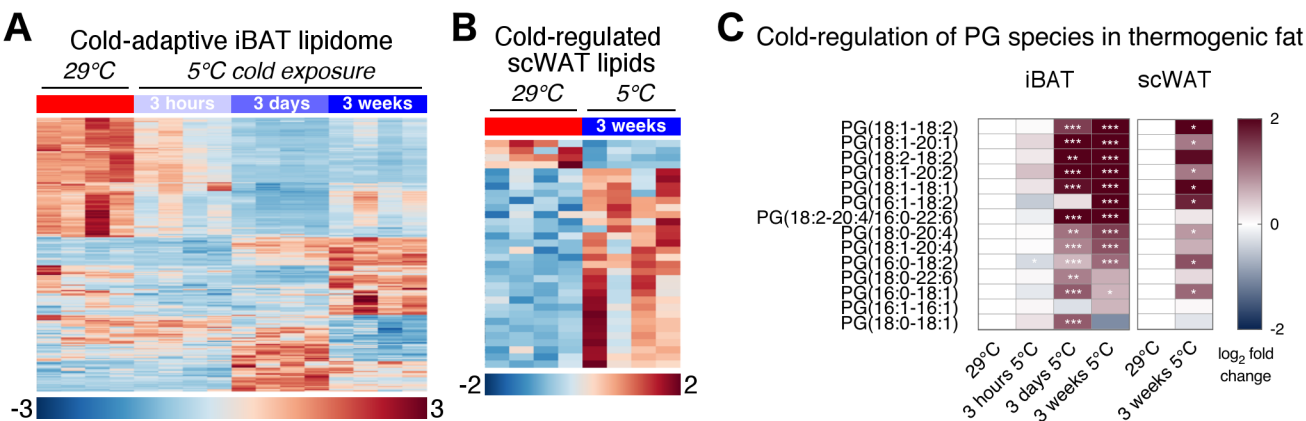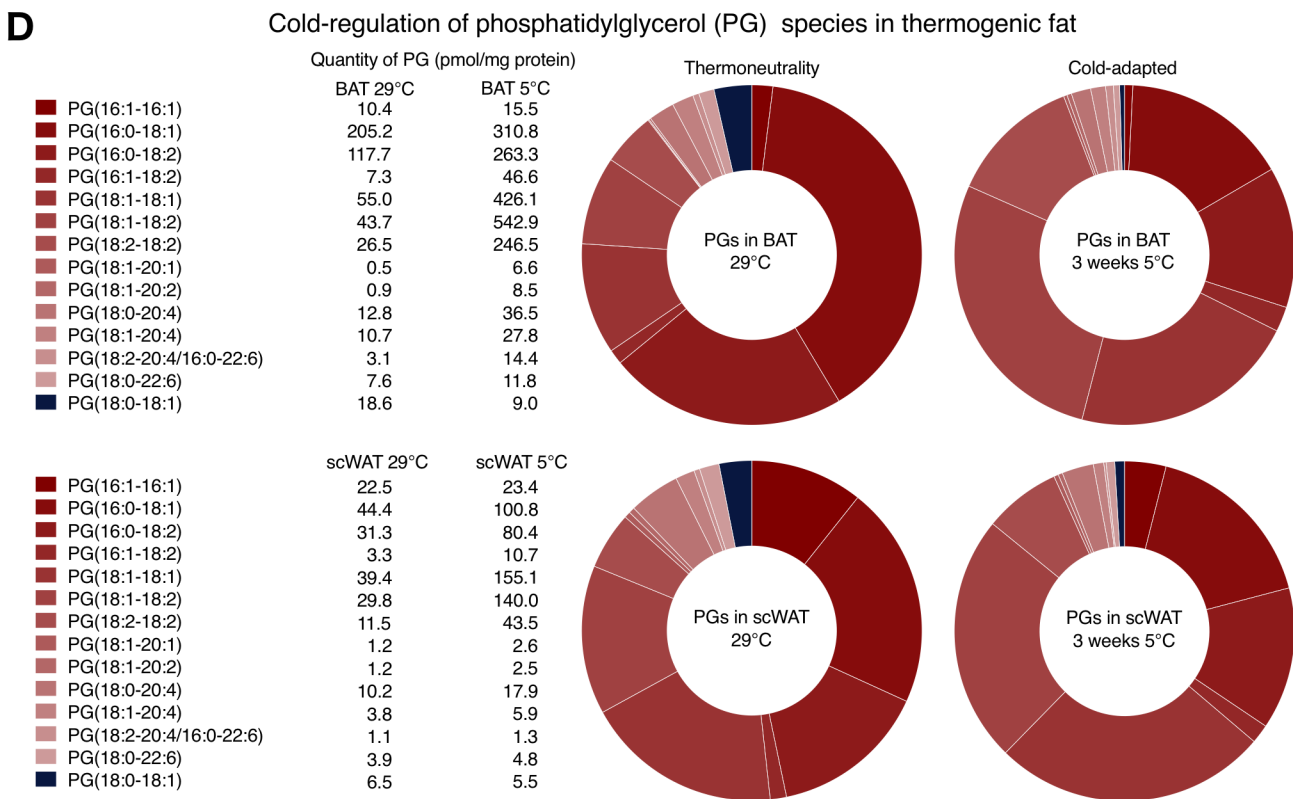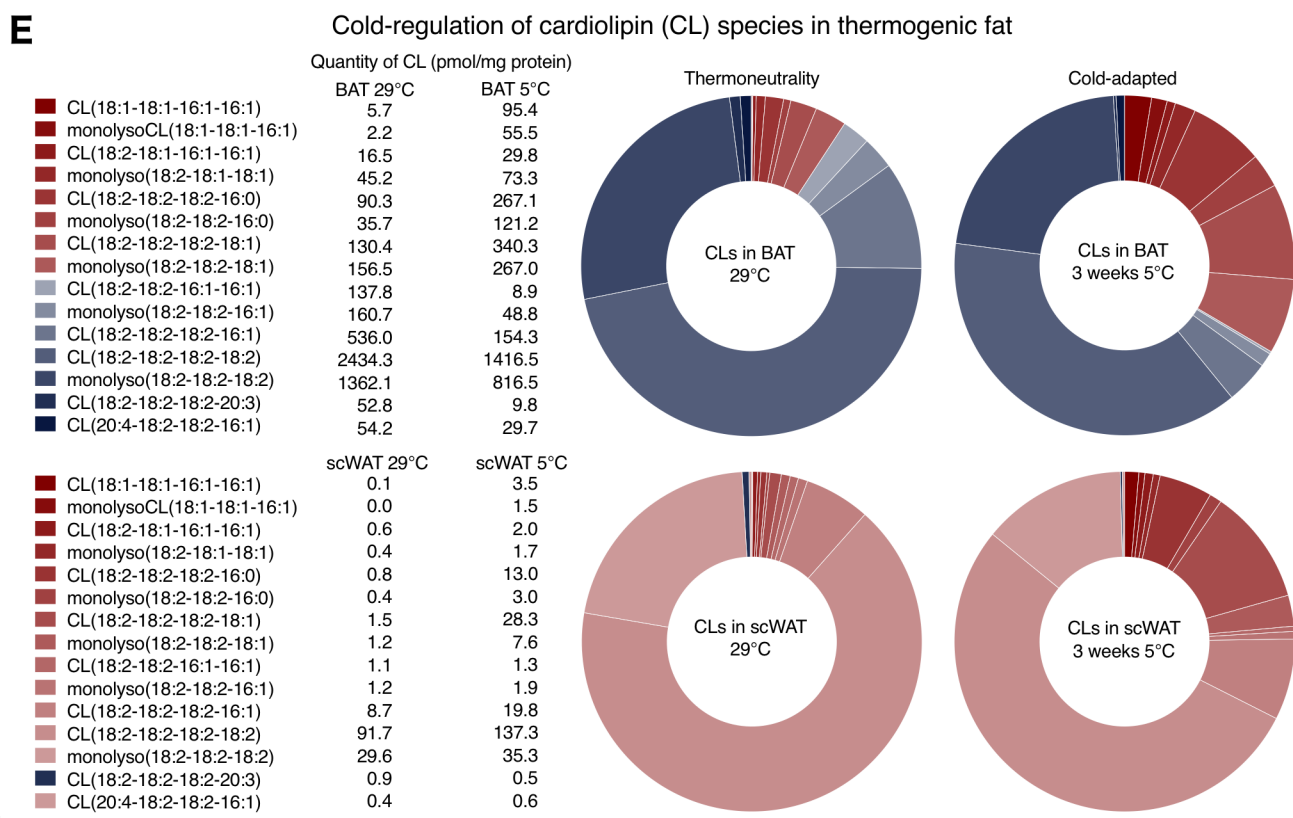

## A *Crls1* loss-of-function in immortal mouse brown adipocytes

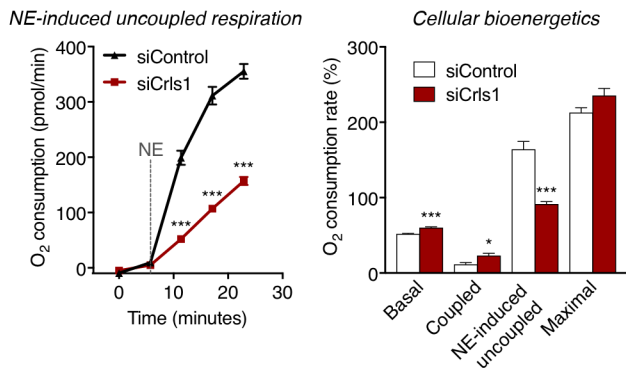

## B Raw OCR trace for mouse primary brown adipocytes

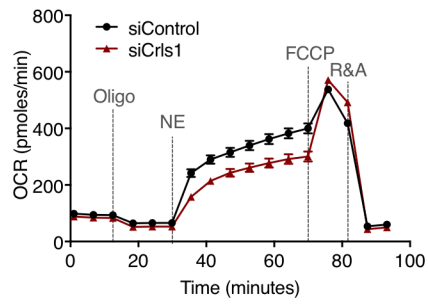

## C Raw OCR trace for mouse primary subcutaneous adipocytes

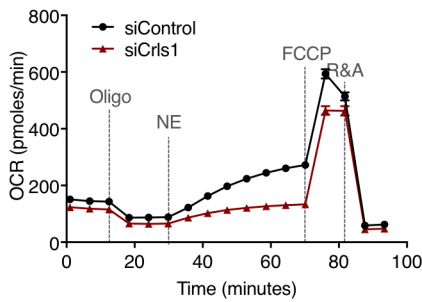

## D Primary brown adipocytes treated with siRNA

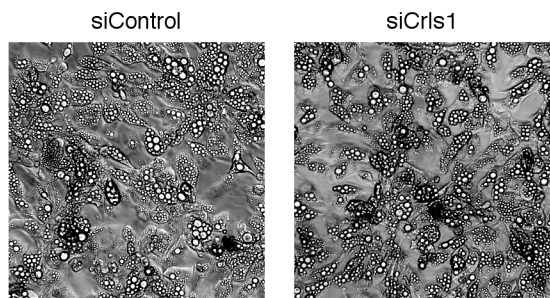

## E Primary subcutaneous adipocytes treated with siRNA

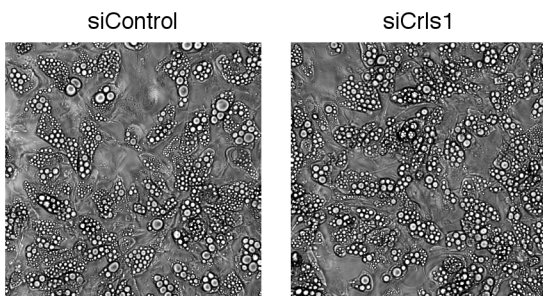

## F Gene expression in primary adipocytes treated with siRNA

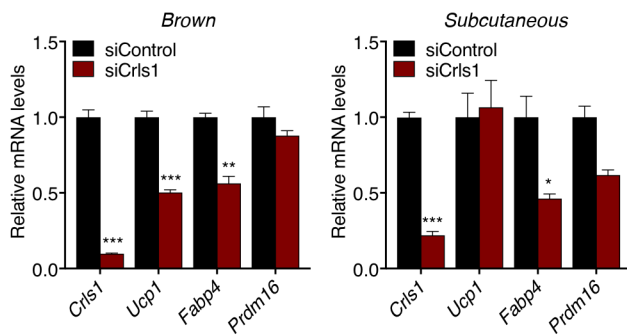

## G Raw OCR trace for TAM-induced *Crls1* knockout in brown adipocytes

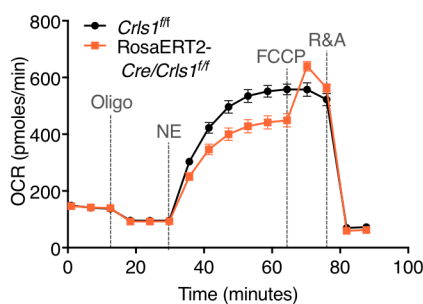

## H TAM-induced *Crls1* knockout in primary brown adipocytes

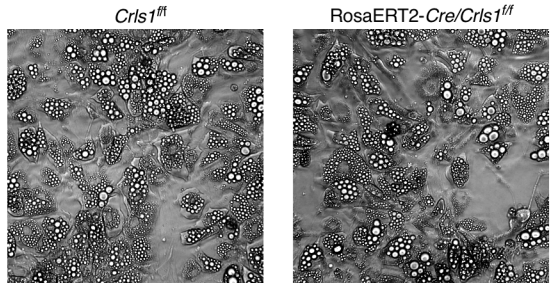

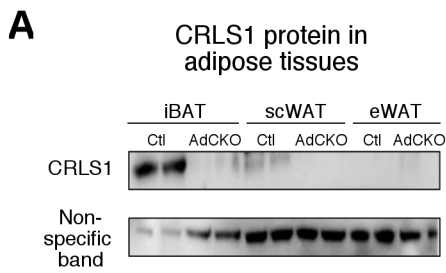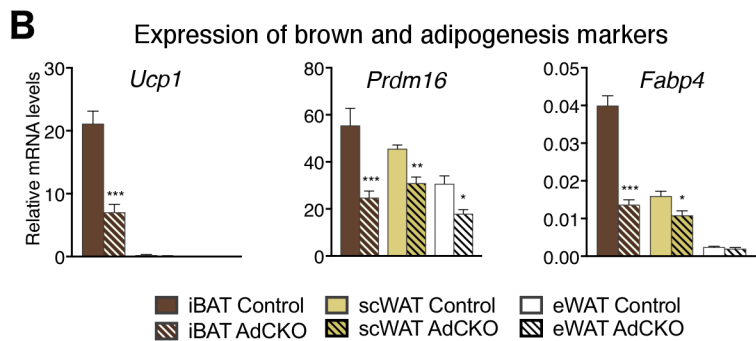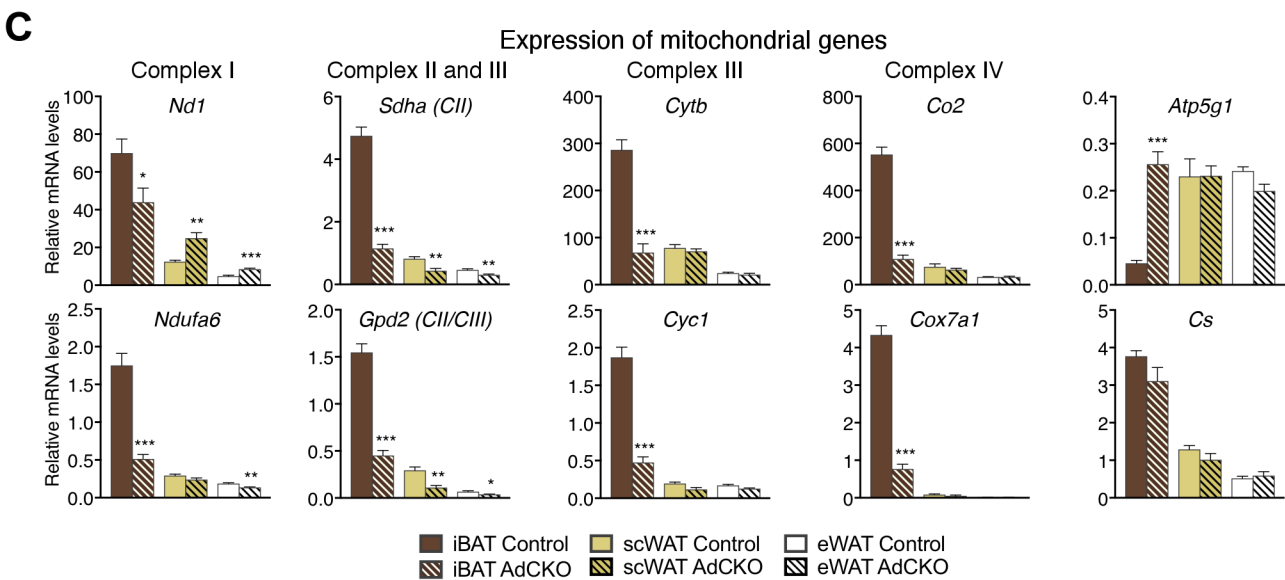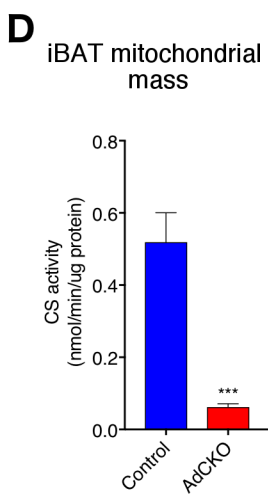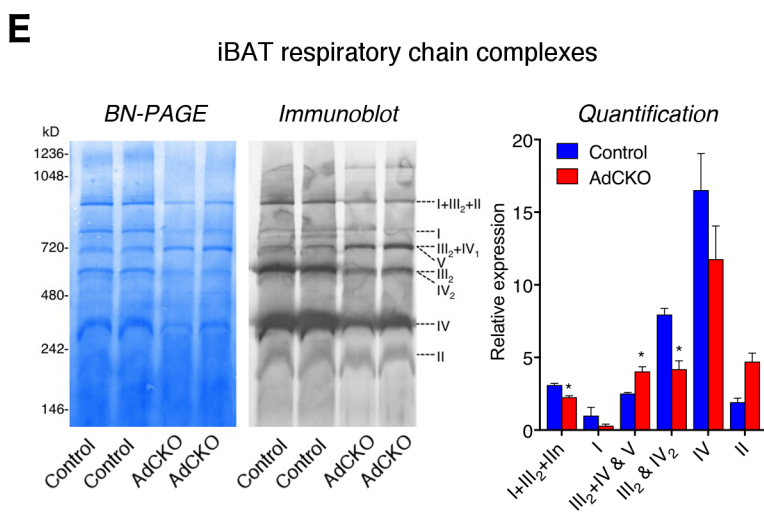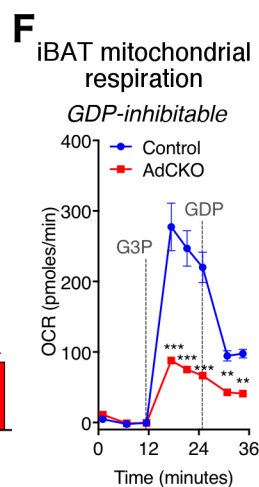

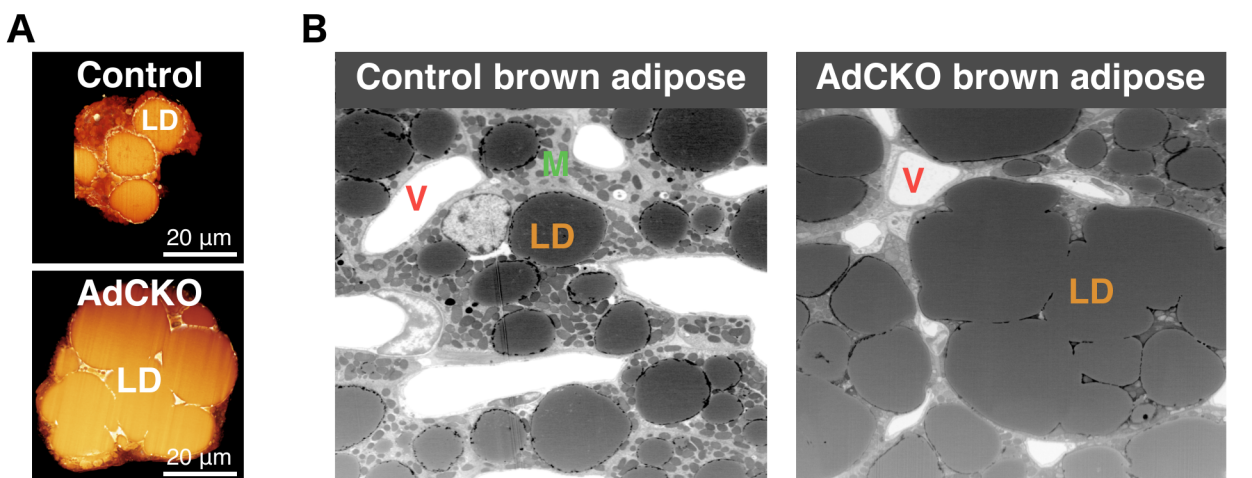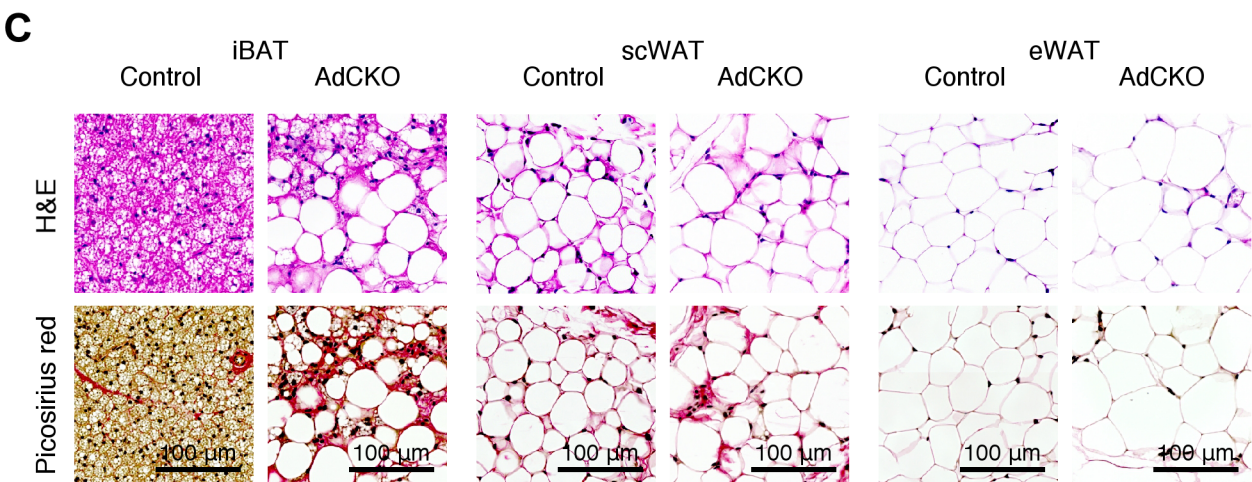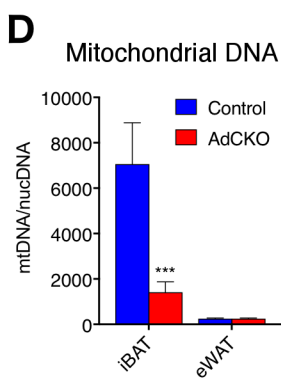

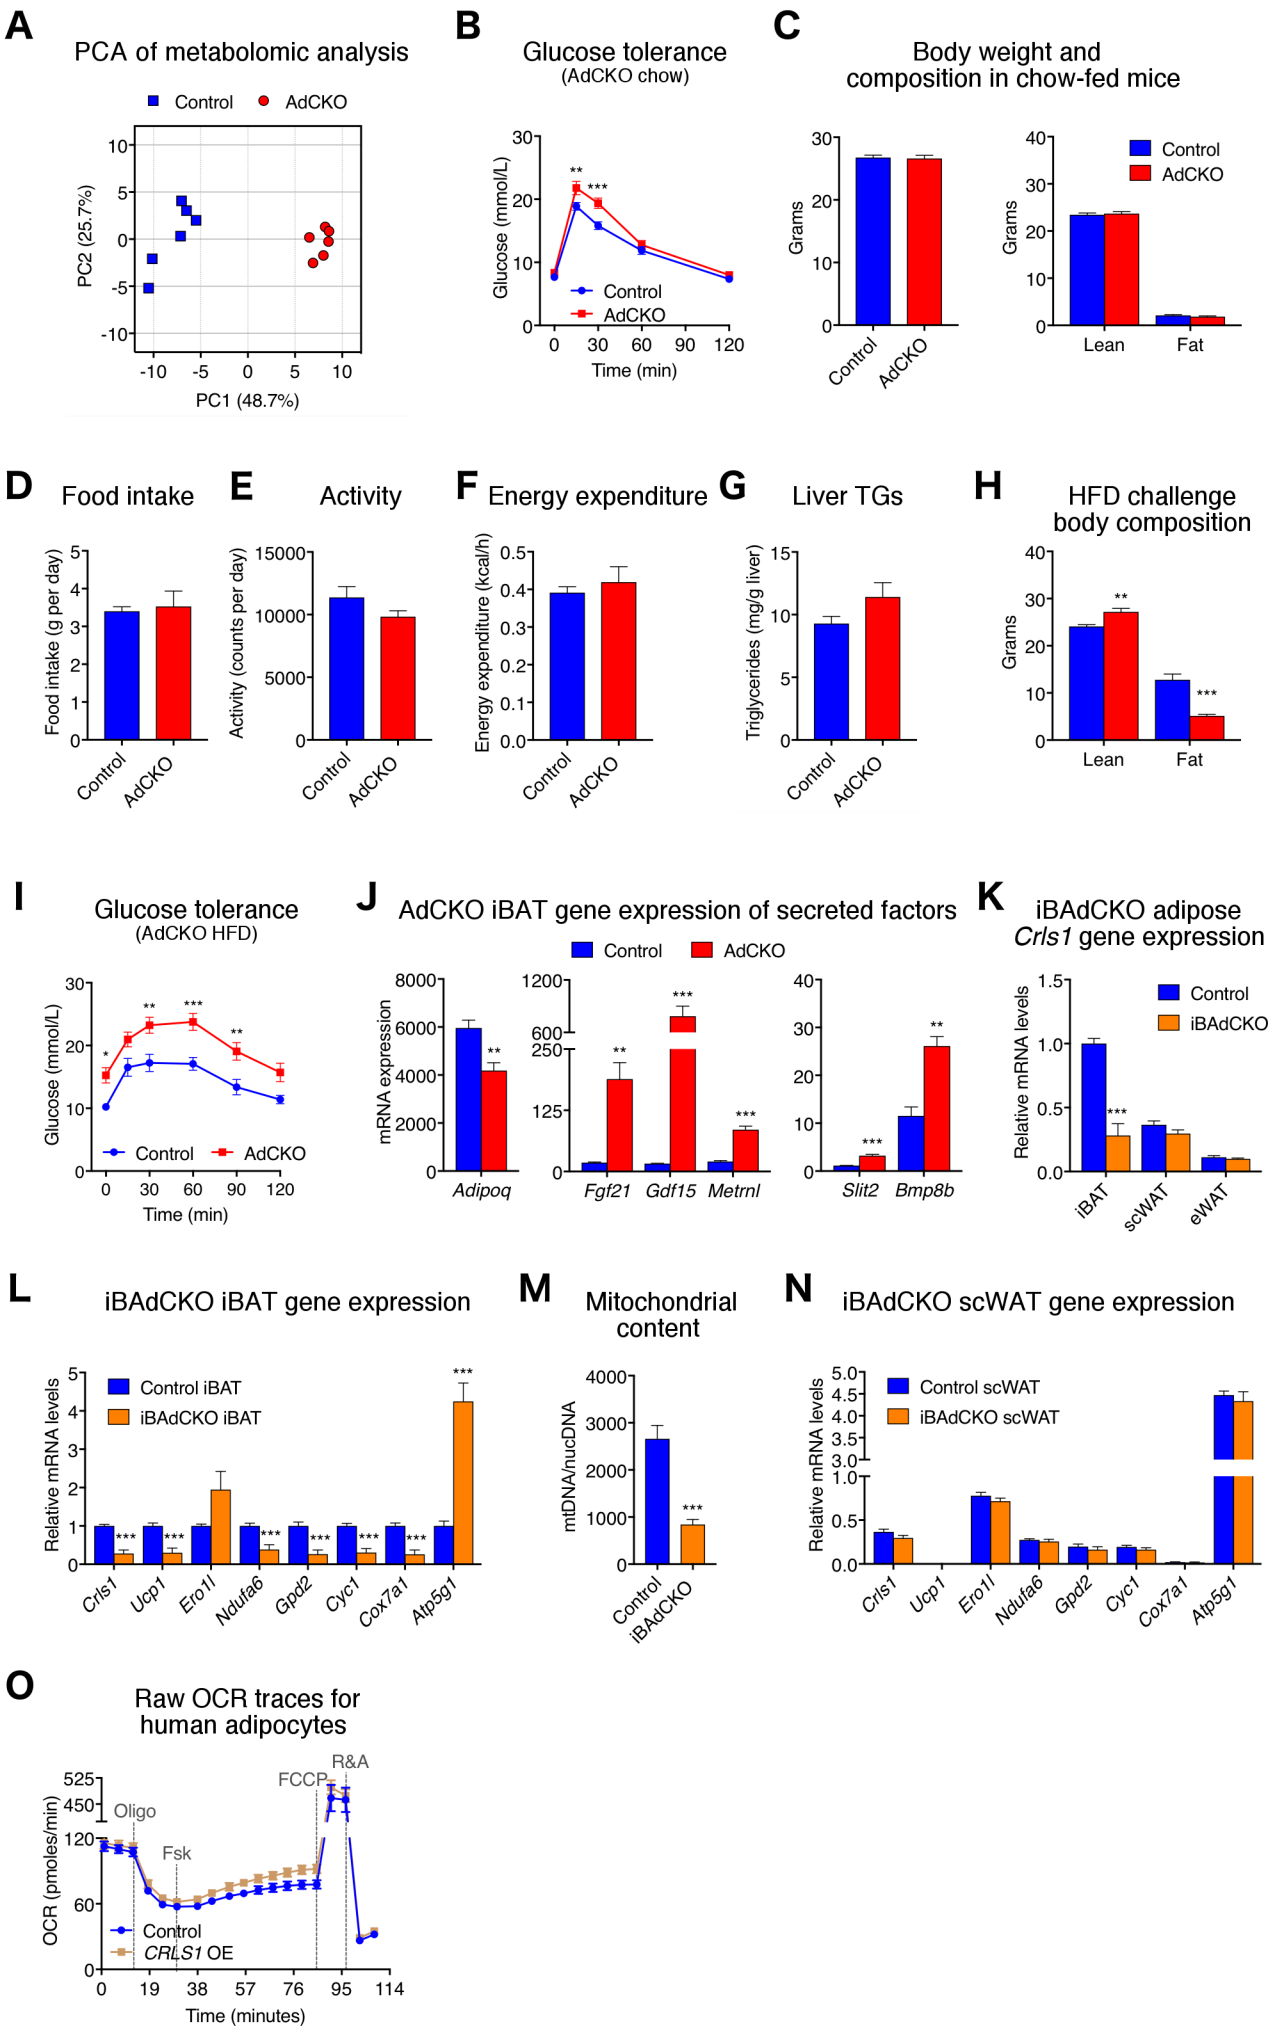

**CRLS1**

| SNP                                      | exm2254358                           | exm1524246                                |
|------------------------------------------|--------------------------------------|-------------------------------------------|
| rs-id                                    | rs149380663                          | rs41282950                                |
| Chromosome                               | 20                                   | 20                                        |
| Position (build 37)                      | 6017765                              | 6011934                                   |
| Effect allele                            | C                                    | T                                         |
| Non effect allele                        | T                                    | C                                         |
| Minor Allele Frequency (MAF)             | 0.0005051                            | 0.1291                                    |
| Genotypes (HO/HE/WT)                     | 0/16/15824                           | 278/3509/11956                            |
| MAF in overlapping exome sequencing      | 0.0005089                            | 0.1364                                    |
| Annotation                               | coding-synonymous                    | missense                                  |
| P (HWE)                                  | 1                                    | 0.3                                       |
| <b>Fasting serum Insulin</b>             | n=9072, b=0.78(0.3),<br>p=0.0099     | n=9024, b=-0.02375(0.02209),<br>p=0.2824  |
| <b>2 h serum inuslin after OGTT</b>      | n=6225, b=1.20(0.40),<br>p=0.0023    | n=6196, b=-0.000756(0.02611),<br>p=0.9769 |
| <b>HOMA-IR</b>                           | n=9066, b=0.78(0.3), p=0.0088        | n=9018, b=-0.02109(0.022),<br>p=0.3378    |
| <b>BIGTT-SI</b>                          | n=5743, b=-1.20(0.39),<br>p=0.0017   | n=5715, b=0.0107(0.02634),<br>p=0.6846    |
| <b>Matsuda Insulin Sensitivity Index</b> | n=5744, b=-1.20(0.4048),<br>p=0.0031 | n=5716, b=0.02111(0.02755),<br>p=0.4436   |
| <b>Body Mass Index</b>                   | n=14684, b=0.66(0.28),<br>p=0.019    | n=14596, b=0.002395(0.02011),<br>p=0.9052 |
| <b>Waist to hip Ratio</b>                | n=12380, b=0.44(0.22),<br>p=0.045    | n=12309, b=-0.001856(0.01462),<br>p=0.899 |



| <b>PGS1</b>                         |                                           |                                             |                                         |                                        |                                          |
|-------------------------------------|-------------------------------------------|---------------------------------------------|-----------------------------------------|----------------------------------------|------------------------------------------|
| SNP                                 | exm1360386                                | exm-rs4129767                               | exm1903516                              | exm1360454                             | exm1360417                               |
| rs-id                               | rs2292642                                 | rs4129767                                   | rs0                                     | rs0                                    | rs145352765                              |
| Chromosome                          | 17                                        | 17                                          | 17                                      | 17                                     | 17                                       |
| Position (build 37)                 | 76395430                                  | 76403984                                    | 76395468                                | 76420046                               | 76399916                                 |
| Effect allele                       | C                                         | C                                           | A                                       | C                                      | G                                        |
| Non effect allele                   | T                                         | T                                           | G                                       | T                                      | A                                        |
| Minor Allele Frequency (MAF)        | 0.3941                                    | 0.492                                       | 0.0004419                               | 0.0007261                              | 0.00101                                  |
| Genotypes (HO/HE/WT)                | 2481/7522/5835                            | 3875/7834/4128                              | 0/14/15826                              | 0/23/15815                             | 0/32/15808                               |
| MAF in overlapping exome sequencing | 0.3908                                    | NA                                          | 0.0005089                               | 0.0007634                              | 0.001018                                 |
| Annotation                          | coding-synonymous-near-splice             | intron                                      | missense                                | missense                               | missense                                 |
| P (HWE)                             | 0.5                                       | 0.2                                         | 1                                       | 1                                      | 1                                        |
| Fasting serum Insulin               | n=9071, b=0.01473(0.01517),<br>p=0.3316   | n=9071, b=0.00756(0.01471),<br>p=0.6073     | n=9072, b=-0.2511(0.3317),<br>p=0.449   | n=9071, b=0.2003(0.2489),<br>p=0.421   | n=9072, b=-0.153(0.2414),<br>p=0.5261    |
| 2 h serum inuslin after OGTT        | n=6225, b=-0.02387(0.01821),<br>p=0.1899  | n=6225, b=-0.02502(0.01763),<br>p=0.1559    | n=6225, b=-0.6052(0.4924),<br>p=0.2191  | n=6225, b=0.1513(0.2844),<br>p=0.5948  | n=6225, b=-0.1597(0.2845),<br>p=0.5745   |
| HOMA-IR                             | n=9065, b=0.01591(0.01511),<br>p=0.2923   | n=9065, b=0.007687(0.01465),<br>p=0.5997    | n=9066, b=-0.3588(0.3302),<br>p=0.2773  | n=9065, b=0.1782(0.2478),<br>p=0.472   | n=9066, b=-0.1576(0.2403),<br>p=0.5119   |
| BIGTT-SI                            | n=5743, b=0.02049(0.0183),<br>p=0.263     | n=5743, b=0.03331(0.01772),<br>p=0.06021    | n=5743, b=0.8352(0.4737),<br>p=0.07792  | n=5743, b=-0.1838(0.2737),<br>p=0.5018 | n=5743, b=0.2029(0.2737),<br>p=0.4585    |
| Matsuda Insulin Sensitivity Index   | n=5744, b=0.01228(0.01914),<br>p=0.5211   | n=5744, b=0.02359(0.01854),<br>p=0.2033     | n=5744, b=0.241(0.4957),<br>p=0.6269    | n=5744, b=-0.1435(0.2864),<br>p=0.6163 | n=5744, b=0.1837(0.2864),<br>p=0.5214    |
| Body Mass Index                     | n=14682, b=-0.00141(0.01375),<br>p=0.9183 | n=14682, b=0.002514(0.0134),<br>p=0.8512    | n=14684, b=-0.4243(0.3206),<br>p=0.1858 | n=14682, b=0.1177(0.2465),<br>p=0.6331 | n=14684, b=0.8199(0.211),<br>p=0.0001026 |
| Waist to hip Ratio                  | n=12379, b=-0.02275(0.00999),<br>p=0.0228 | n=12379, b=-0.01782(0.009726),<br>p=0.06701 | n=12380, b=-0.1942(0.2324),<br>p=0.4034 | n=12378, b=0.2352(0.1724),<br>p=0.1724 | n=12380, b=0.06486(0.1512),<br>p=0.668   |

|                                          | PTPMT1                                   |                                           |                                         |
|------------------------------------------|------------------------------------------|-------------------------------------------|-----------------------------------------|
| SNP                                      | exm905472                                | exm905451                                 | exm905478                               |
| rs-id                                    | rs0                                      | rs11537751                                | rs3207211                               |
| Chromosome                               | 11                                       | 11                                        | 11                                      |
| Position (build 37)                      | 47593180                                 | 47587452                                  | 47594541                                |
| Effect allele                            | C                                        | T                                         | T                                       |
| Non effect allele                        | G                                        | C                                         | C                                       |
| Minor Allele Frequency (MAF)             | 0.004211                                 | 0.04476                                   | 0.0007891                               |
| Genotypes (HO/HE/WT)                     | 0/133/15660                              | 39/1340/14460                             | 0/25/15815                              |
| MAF in overlapping exome sequencing      | 0.003053                                 | 0.04377                                   | 0.0005089                               |
| Annotation                               | stop-lost                                | missense                                  | missense                                |
| P (HWE)                                  | 1                                        | 0.2                                       | 1                                       |
| <b>Fasting serum Insulin</b>             | n=9057, b=0.05328(0.1177),<br>p=0.6508   | n=9071, b=0.02202(0.0355),<br>p=0.5351    | n=9072, b=0.09986(0.2284),<br>p=0.662   |
| <b>2 h serum inuslin after OGTT</b>      | n=6218, b=0.09233(0.1372),<br>p=0.5011   | n=6224, b=0.04286(0.04261),<br>p=0.3145   | n=6225, b=0.3108(0.3115),<br>p=0.3185   |
| <b>HOMA-IR</b>                           | n=9051, b=0.05272(0.1172),<br>p=0.6528   | n=9065, b=0.02628(0.03538),<br>p=0.4577   | n=9066, b=0.07631(0.2274),<br>p=0.7372  |
| <b>BIGTT-SI</b>                          | n=5737, b=-0.1006(0.1361),<br>p=0.4596   | n=5742, b=-0.05365(0.0426),<br>p=0.2079   | n=5743, b=-0.06158(0.2998),<br>p=0.8372 |
| <b>Matsuda Insulin Sensitivity Index</b> | n=5738, b=-0.03154(0.1424),<br>p=0.8247  | n=5743, b=-0.05512(0.04457),<br>p=0.2162  | n=5744, b=-0.07592(0.3137),<br>p=0.8088 |
| <b>Body Mass Index</b>                   | n=14642, b=0.06366(0.1038),<br>p=0.5398  | n=14683, b=0.03041(0.03242),<br>p=0.3483  | n=14684, b=0.03309(0.2313),<br>p=0.8862 |
| <b>Waist to hip Ratio</b>                | n=12339, b=-0.05923(0.07553),<br>p=0.433 | n=12379, b=0.007127(0.02335),<br>p=0.7602 | n=12380, b=0.02085(0.1682),<br>p=0.9014 |

| Species | Gene                     | Forward (Sequence 5'-3') | Reverse (Sequence 5'-3') | Use                                       |
|---------|--------------------------|--------------------------|--------------------------|-------------------------------------------|
| human   | <i>36B4</i>              | TTTGTGTTACCAAGGAGGA      | GTGACTTCACATGGGGCAAT     | mRNA quantification                       |
| human   | <i>CRLS1</i>             | GCTTGGCCCCAGTTCTGG       | GGCCCAGTTTCGAGCAATAA     | mRNA quantification                       |
| human   | <i>FABP4</i>             | TACTGGGCCAGGAATTTGAC     | TACCAGGACACCCCCATCTA     | mRNA quantification                       |
| human   | <i>PRDM16</i>            | CGGCAAAGGAGACAGACTTC     | CATCCACGCAGAACTTCTCA     | mRNA quantification                       |
| Human   | <i>UCP1</i>              | AAGGCTTGACGGGTCTTTG      | CGATAAGAGCCGACACCAAG     | mRNA quantification                       |
| mouse   | <i>36b4</i>              | TCATCCAGCAGGTGTTTGACA    | GGCACCGAGGCAACAGTT       | mRNA quantification                       |
| mouse   | <i>Atp5g1</i>            | TTGGCACAGTGTGGTAGC       | CAAACCCAGAAATGGCATAG     | mRNA quantification                       |
| mouse   | <i>Co2</i>               | ATTTAGTCGGCCTGGGATG      | ACCGAGTCGTTCTGCCAATA     | mRNA and mitochondrial DNA quantification |
| mouse   | <i>Cox7a1</i>            | AAAACCGTGTGGCAGAGAAG     | CAGCGTCATGGTCAGTCTGT     | mRNA quantification                       |
| mouse   | <i>Crls1</i>             | GGGCTACCTGATTCTTGAAGA    | GGCCCAGTTTCGAGCAATAA     | mRNA quantification                       |
| mouse   | <i>Cs</i>                | GGGGTGCTGCTCCAGTACTATG   | AAAGGCCCTGAAACAAAACAAA   | mRNA quantification                       |
| mouse   | <i>Cyc1</i>              | GAGCTTTACCCCCTGACCTC     | GTAGCCAGTGAGCAGGGAAA     | mRNA quantification                       |
| mouse   | <i>Cytb</i>              | ATTCCTTCATGTCGGACGAG     | CTGTGGCTATGACTGCGAAC     | mRNA and mitochondrial DNA quantification |
| mouse   | <i>Ddit3 (Chop-10)</i>   | TATCTCATCCCCAGGAAACG     | GATGTGCGTGTGACCTCTGT     | mRNA quantification                       |
| mouse   | <i>Ero1l</i>             | CTTCAGTGGACCAAGCATGA     | GCCCCTGTAGCCTGTGTAG      | mRNA quantification                       |
| mouse   | <i>Fabp4</i>             | GGGCGTGGAATTCGATGAAA     | GGTCGACTTCCATCCCCT       | mRNA quantification                       |
| mouse   | <i>Gpd2</i>              | AAAACGTTGTTCCCATCTGC     | CACTGGTTGCAGGATCAAGA     | mRNA quantification                       |
| mouse   | <i>Nd1</i>               | GGATCCGAGCATCTTATCCA     | GGTGGTACTCCCGCTGTAAA     | mRNA and mitochondrial DNA quantification |
| mouse   | <i>Nd2</i>               | AACCCACGATCAACTGAAGC     | GCGAGGCCTAGTTTTATGGA     | mRNA and mitochondrial DNA quantification |
| mouse   | <i>Ndufa6</i>            | ACCCAGAGTGTTGATCTG       | GGAAAAACCGCATAACGTGT     | mRNA quantification                       |
| mouse   | <i>Nuclear DNA-Pparg</i> | TTTGGAATTCTCACAAACTTCA   | TTTTCTACTGCTGGGGATGG     | mitochondrial DNA quantification          |
| mouse   | <i>Prdm16</i>            | CCTGTGGGAGTCCTGAAAGA     | CAGCTTCTCCGTCATGGTTT     | mRNA quantification                       |
| mouse   | <i>Sdha</i>              | AACACTGGAGGAAGCACACC     | GCACAGTCAGCCTCATTCAA     | mRNA quantification                       |
| mouse   | <i>Ucp1</i>              | GGATTGGCCTCTACGACTCA     | TAAGCCGGCTGAGATCTTGT     | mRNA quantification                       |
| mouse   | <i>Nuclear DNA-Ucp1</i>  | GAGGCAGTCAAGAGCAGCTT     | GCCCAATACACAAGCCCTAA     | mitochondrial DNA quantification          |

## SUPPLEMENTAL FIGURE LEGENDS

**Figure S1. Proteomic analysis of iBAT from cold exposed mice. Related to Figure 1.** (A) Principle component analysis of iBAT proteomics data. (B) iBAT protein levels of known markers of thermogenesis from proteomic analysis presented in Figure 1A; Glycerokinase (GK), Elongation Of Very Long Chain Fatty Acids 3 (ELOVL3), Glycerol-3-phosphate dehydrogenase 1 (GPD1), Acyl-CoA Synthetase Long-Chain Family Member 5 (ACSL5), and Acetyl-CoA Carboxylase Alpha (ACACA) (n=4 for 29°C and 5°C 3 weeks, n=3 for other groups; one-way ANOVA). AU=arbitrary units. Data are presented as means  $\pm$  SEM. \* $p < 0.05$ ; \*\* $p < 0.01$ ; \*\*\* $p < 0.001$ .

**Figure S2. Lipidomic analysis of iBAT and scWAT from cold exposed mice. Related to Figure 2.** (A) Heatmap of Z score transformed data for 250 significantly altered lipids from targeted lipidomic analysis of interscapular BAT from mice housed at thermoneutrality or exposed to 5°C cold for 3 hours, 3 days, or 3 weeks (n=4 per group, ANOVA). (B) Heatmap of Z score transformed data for the 32 significantly altered lipids from targeted lipidomic analysis of subcutaneous WAT from mice housed at thermoneutrality or exposed to 5°C cold for 3 weeks (n=4 per group, *t* test). (C) Heatmaps of log<sub>2</sub> (fold change cold treated/thermoneutrality) for the 14 phosphatidylglycerol (PG) species measured by targeted lipidomics of iBAT and scWAT from mice housed at thermoneutrality or exposed to 5°C cold for up to 3 weeks (n=4 per group, one-way ANOVA for iBAT and *t* tests for scWAT). Normalized lipid quantities (pmol lipid/mg protein) and donut charts of PG (D) and CL (E) species from targeted lipidomic analysis of interscapular BAT and subcutaneous WAT from mice housed at thermoneutrality or exposed to 5°C cold for 3 weeks (n=4 per group; lipid species increased by cold are shades of maroon and those decreased are shades of dark blue). Data are presented as means  $\pm$  SEM. \* $p < 0.05$ ; \*\* $p < 0.01$ ; \*\*\* $p < 0.001$ .

**Figure S3. Respirometry of adipocytes with *Crls1* loss of function. Related to Figure 3.** (A) Oxygen consumption profiles from control and *Crls1* siRNA-treated immortalized brown adipocytes following addition of oligomycin and NE stimulation (RM two-way ANOVA). Quantified levels of basal mitochondrial, ATP synthesis-coupled, NE-induced uncoupled, and maximal respiration are provided to the right (*t* tests). Raw OCR traces for cellular respirometry on siRNA-treated primary (B) brown and (C) subcutaneous adipocytes. (D) Representative images (200X magnification) of primary brown adipocytes treated with siRNA. (E) Representative images (200X magnification) of primary subcutaneous adipocytes treated with siRNA. (F) mRNA levels of *Crls1* and thermogenic (*Ucp1* and *Prdm16*) and adipogenic (*Fabp4*) markers in siRNA treated primary adipocytes. (G) Raw OCR traces for cellular respirometry on primary brown adipocytes with TAM-induced *Crls1* knockout. (H) Representative images (200X magnification) of primary brown adipocytes from *Rosa26ERT2-Cre/Crls1<sup>ff</sup>* mice with TAM-induced *Crls1* knockout. Data are presented as means  $\pm$  SEM. \**p* < 0.05; \*\**p* < 0.01; \*\*\**p* < 0.001.

**Figure S4. Analysis of mitochondrial genes and proteins in AdCKO adipose tissue. Related to Figure 4.** (A) Western blot of CRLS1 in adipose tissues (iBAT, scWAT and eWAT) from AdCKO mice. (B) mRNA levels of thermogenic (*Ucp1* and *Prdm16*) and adipogenic (*Fabp4*) markers in control and AdCKO adipose tissues (n=6-7, two-way ANOVA). (C) mRNA levels of genes for the electron transport chain complexes I-IV (*Nd1*, *Ndufa6*, *Sdha*, *Gpd2*, *Cytb*, *Cyc1*, *Co2* and *Cox7a1*), as well as *Atp5g1* and *Cs* in control and AdCKO adipose tissues (20 week old males; n=6-7 per group). (D) Mitochondrial mass (as measured by citrate synthase (CS) activity) from control and AdCKO iBAT (n=4-7 per group, *t* test). (E) Respiratory chain complexes and supercomplexes resolved by blue native (BN) page and immunoblot of isolated mitochondrial protein from control and AdCKO iBAT. Quantification is from the immunoblot (*t* tests). (F) Respirometry of mitochondria isolated from AdCKO iBAT and given G3P substrate, followed

by GDP to inhibit UCP1 activity. Data are presented as means  $\pm$  SEM. \* $p < 0.05$ ; \*\* $p < 0.01$ ; \*\*\* $p < 0.001$ .

**Figure S5. Electron microscopy and histology of AdCKO adipose tissue.**

**Related to Figure 4.** (A) Representative cross-sections showing lipid droplets of control and AdCKO adipocytes derived from 3-dimensional reconstructions of AdCKO adipocytes generated from Dual-beam FIB SEM stacks. Representative SEM micrographs of (B) control and AdCKO (C) brown adipose tissue at 5kX magnification generated during Dual-beam FIB SEM. (D) Representative H&E and Picosirius red stained histology sections of iBAT, scWAT and eWAT from control and AdCKO mice. (E) Mitochondrial DNA (mtDNA) content of control and AdCKO brown (iBAT) and epididymal white (eWAT) adipose tissues (n=5 per group,  $t$  tests) measured as a ratio of mtDNA to nuclear DNA (nucDNA). Data are presented as means  $\pm$  SEM. \*\*\* $p < 0.001$ .

**Figure S6. Metabolic phenotyping and gene expression analysis of AdCKO and iBAdCKO adipose tissue. Related to Figures 6 and 7.**

(A) Principle component analysis of metabolomic data from iBAT of control and AdCKO mice (n=6 per group). (B) Glucose tolerance of control and AdCKO mice on chow diet (n=11 per group, two-way ANOVA). (C) Body weight and composition of control (n=15) and AdCKO (n=13) mice on chow diet; (two-way ANOVA). (D) Daily food intake, (E) activity counts, and (F) energy expenditure of control and AdCKO mice (n=6 per group). (G) Hepatic triglyceride concentrations in chow fed control and AdCKO mice (n=7 per group). (H) Body weight and composition (n=11 per group) of control and AdCKO mice on HFD (n=6-15 per group;  $t$  tests). (I) Glucose tolerance of control and AdCKO mice on HFD (control n=10, AdCKO n=9; two-way ANOVA). (J) Gene expression of secreted factors from RNA-seq of AdCKO iBAT. (K) *Crls1* gene expression in iBAdCKO adipose tissues and (L) gene expression in iBAdCKO iBAT (n=5,  $t$  tests). (M) Mitochondrial DNA (mtDNA) content of control and iBAdCKO iBAT (n=8,  $t$  test) measured as a ratio of mtDNA to nuclear DNA

(nucDNA). (N) Gene expression in iBAdCKO scWAT (n=5, *t* tests). (O) Raw OCR traces for cellular respirometry on human adipocytes with CRISPRa-SAM mediated expression of *CRLS1*. Data are presented as means  $\pm$  SEM. \**p* < 0.05; \*\**p* < 0.01; \*\*\**p* < 0.001.

## **SUPPLEMENTAL TABLES**

**Table S1. Table of human genetic association data for variants in CL synthesis and remodeling genes. Related to Figure 7.**

**Table S2. Sequences of primers used for gene expression analysis and mitochondrial DNA quantification. Related to STAR Methods.**
